# Supplementary material for: Real-Time Tracking of the intramolecular vibrational dynamics of liquid water
Source: Research Square preprint supplement (doi:10.21203/rs.3.rs-6745336/v1), 2025-06-03
Supplement: Supplementary file 1 [file d4263a2b925b7364ef582241.pdf]

## **Supplementary Information:**

**“Real-time tracking of the intramolecular  
vibrational dynamics of liquid water”**

G. Giovannetti, S. Ryabchuk, A. Bin Wahid, H.-Y. Chen, G. Batignani,  
E. P. Månsson, O. Cannelli, E. Mai, A. Trabattoni, O. Neufeld, A. Rubio,  
V. Wanie, H. Marroux, T. Scopigno, M. Chergui, and F. Calegari

## Supplementary Note 1: Fitting of the pump-probe signal and extraction of the OH stretch mode decay time

The decay time of the OH stretch mode is extracted by fitting the transient signal, which is obtained by integrating the blue side of the differential absorption spectrum between 223 and 253 nm. To consider both the exponential decay and the oscillatory dynamics, the fitting equation is given by:

$$S(t) = a (\cos(\omega t + \phi))e^{-bt} + c \quad (1)$$

where the fitting parameters are:

| Parameter | Value   | Standard Deviation       | Units                |
|-----------|---------|--------------------------|----------------------|
| $a$       | -0.09   | $\pm 0.02$               | mOD                  |
| $b$       | 0.040   | $\pm 0.007$              | $\text{fs}^{-1}$     |
| $c$       | 0.00000 | $\pm 4.9 \times 10^{-4}$ | mOD                  |
| $\omega$  | 0.61    | $\pm 0.01$               | $\text{rad fs}^{-1}$ |
| $\phi$    | 1.20    | $\pm 0.25$               | rad                  |

Table 1: Table of parameter values with standard deviations and units

From the parameter  $b$  reported in Table 1, we can extract an exponential decay time of  $25.0 \pm 4.4$  fs.

## Supplementary Note 2: Laser pulses properties

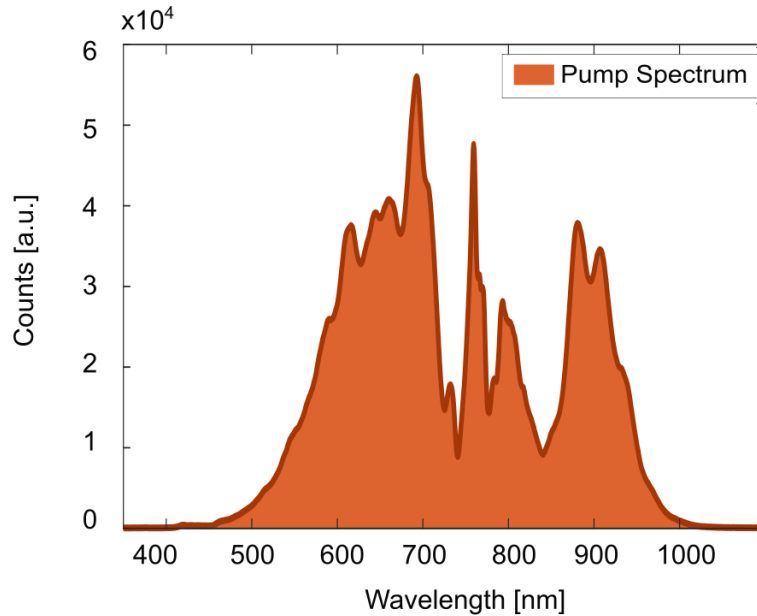

Supplementary Figure 1: Spectrum of the 4.5 fs visible-NIR pump.

Supplementary Figure 1 shows the spectrum of the few-cycle near-infrared (NIR) pump, common to all measurements reported in this work, which spans from 500 nm to 975 nm. The pulse duration is 4.5 fs and it has been measured using the frequency-resolved optical gating (FROG) approach. The spectral and temporal characteristics of the UV probe vary across the different scans. For the scans reported in Fig. 2a, 2b, and 2c, the spectrum of the UV pulses is shown in Supplementary Figure 2 and corresponds to a transform-limited pulse

duration of 2.7 fs. For the measurements reported in Figure 4 and Supplementary Figure 7, the chirp of the UV probe is set to C1, C2, and C3 by using a pair of fused silica wedges inserted in the NIR driving laser pulse. The associated spectra are shown in Supplementary Figure 3.

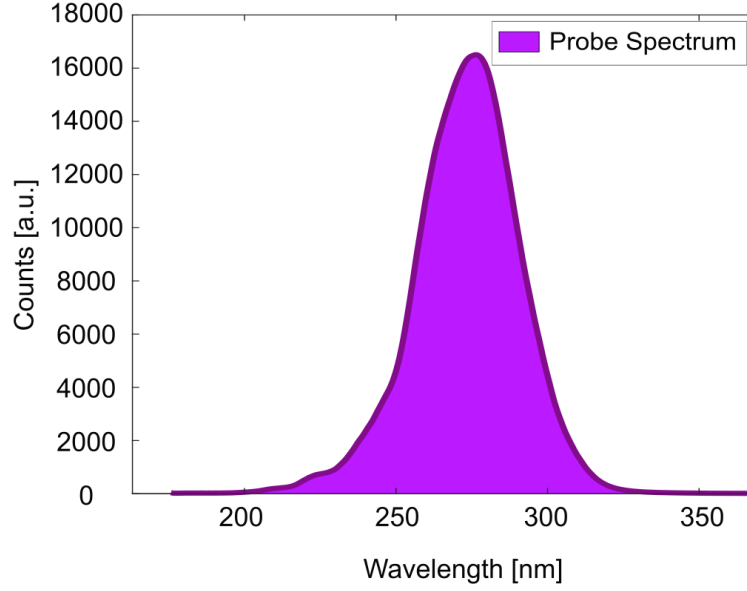

Supplementary Figure 2: Typical UV spectrum used in the experiments. The transform-limited pulse duration is 2.7 fs.

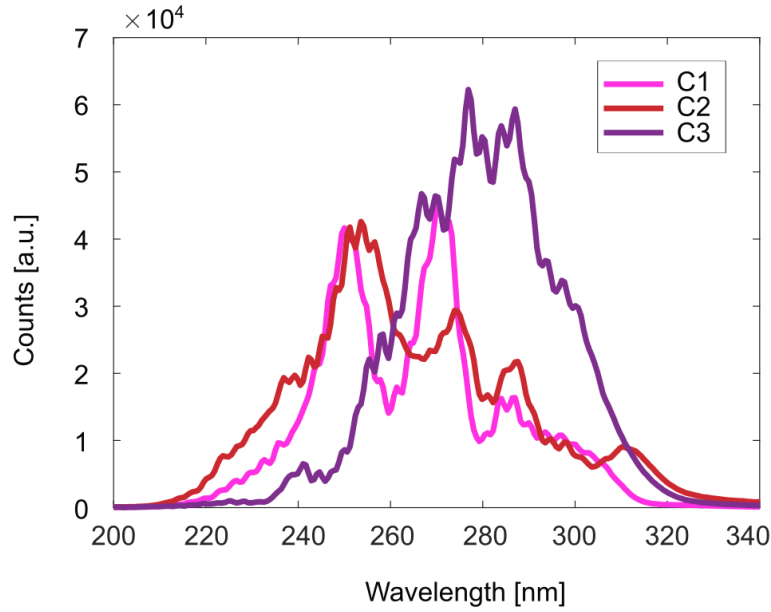

Supplementary Figure 3: The three UV probe spectra associated with the three chirp values C1, C2 and C3 support transform-limited pulse duration of 2.3 fs, 1.9 fs and 2.6 fs, respectively. The amount of glass inserted in the NIR driver laser used for the UV generation allows for tuning the central wavelength and especially the bandwidth of the UV probe. C2 corresponds to a UV spectrum optimized in terms of bandwidth and spectral phase, while C1 and C3 are obtained by removing and adding glass relative to the optimal wedge position, respectively.

### Supplementary Note 3: Retrieval of the probe pulse duration

The time duration and chirp values of the UV pulses associated to the three different spectra in Supplementary Figure 3 have been extracted from the experiment. The spectra depicted in the upper panels of Supplementary Figures 4, 5, and 6 corresponds to UV spectra recorded at various time delays in the absence of the pump, for the three different chirp values of the UV probe: C1, C2, and C3, respectively.

Single shot UV spectra have been recorded for all chirp values and some outliers spectra have been excluded to limit the effects of spectral fluctuations. The remaining spectra are then averaged. Additionally, the analysis is restricted to a narrow region around the central wavelength of the UV spectra, excluding the edges of the spectrum from the fitting process. The duration of the UV pulses is calculated by first determining the transform-limited pulse duration of each averaged spectrum and subsequently adding a quadratic temporal phase.

The bottom panels of Figures 4, 5, and 6 show the retrieved UV pulse duration of 9, 10 and 5.8 fs for the three measurements C1, C2, and C3, respectively, assuming only a second order dispersion. It is worth noting that these results include the dispersive contribution of the water sample, which however does not significantly alter the duration of the transmitted pulses due to the relatively small thickness of the sample ( $GVD_{\text{water}} = 222 \text{ fs}^2 \text{ mm}^{-1}$  at 260 nm, and maximum jet thickness 5  $\mu\text{m}$ ).

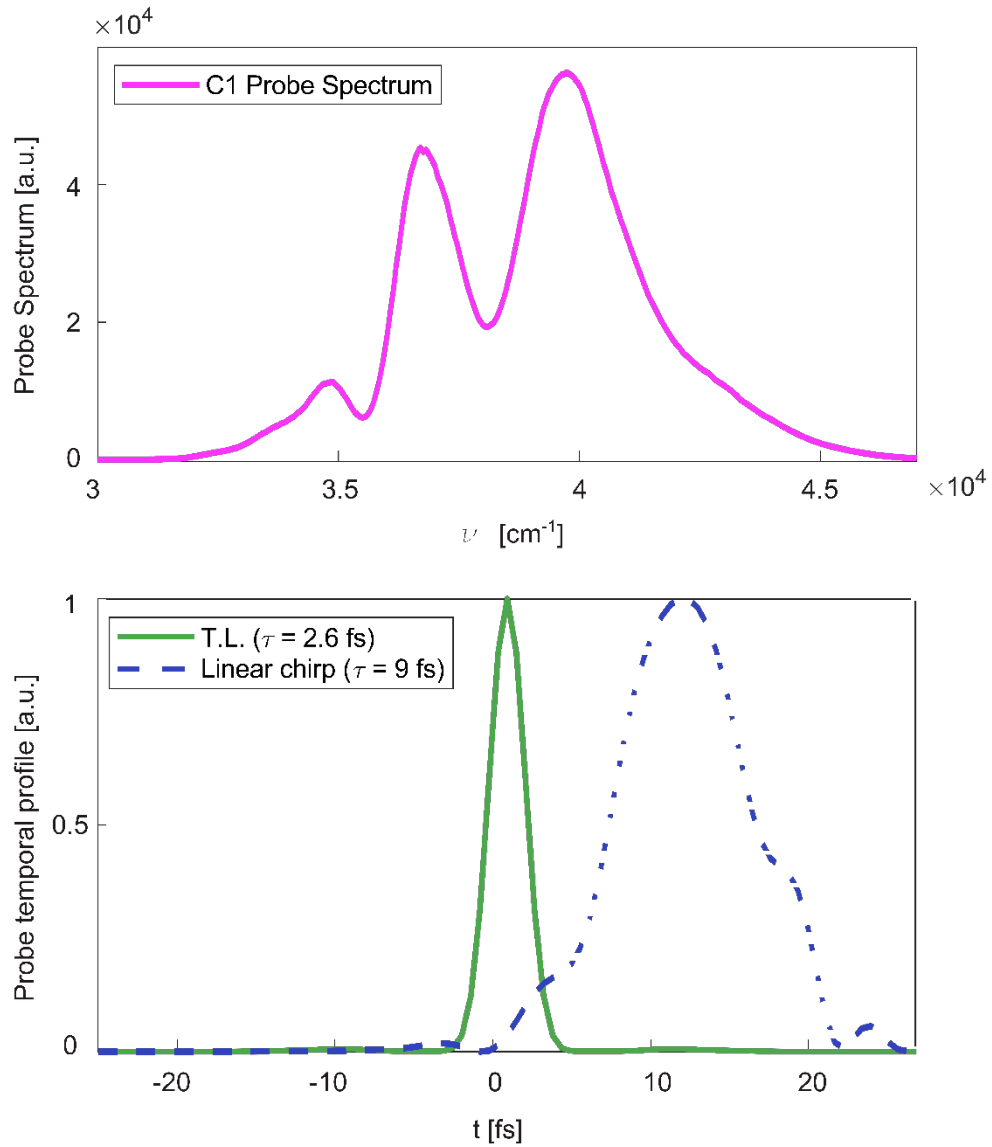

Supplementary Figure 4: Top: Static UV spectrum associated with C1. Bottom: Retrieval of the UV pulse transform-limited duration (green) and of the duration in the presence of linear chirp (blue).

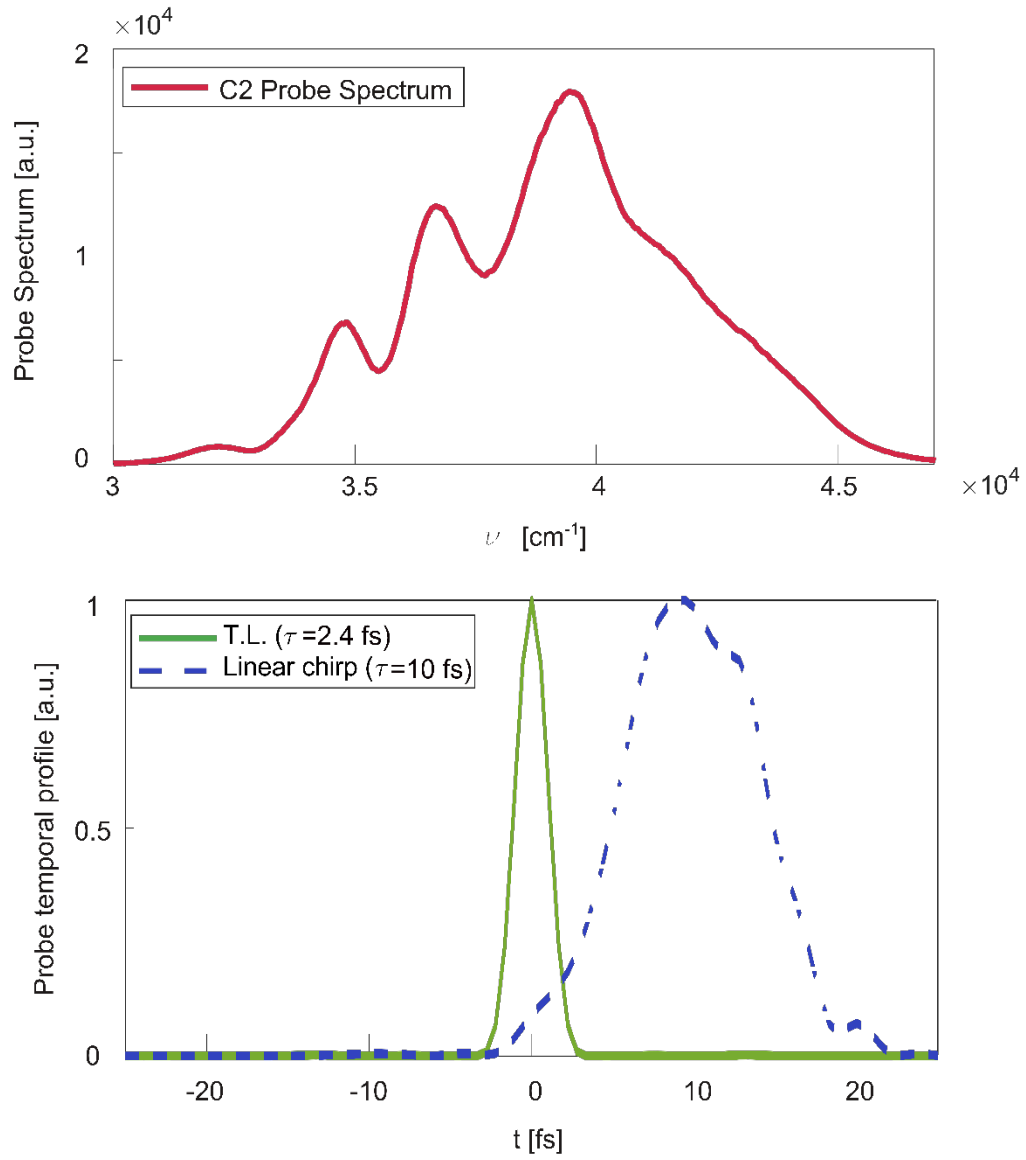

Supplementary Figure 5: Top: Static UV spectrum associated with C2. Bottom: Retrieval of the UV pulse transform-limited duration (green) and of the duration in the presence of linear chirp (blue).

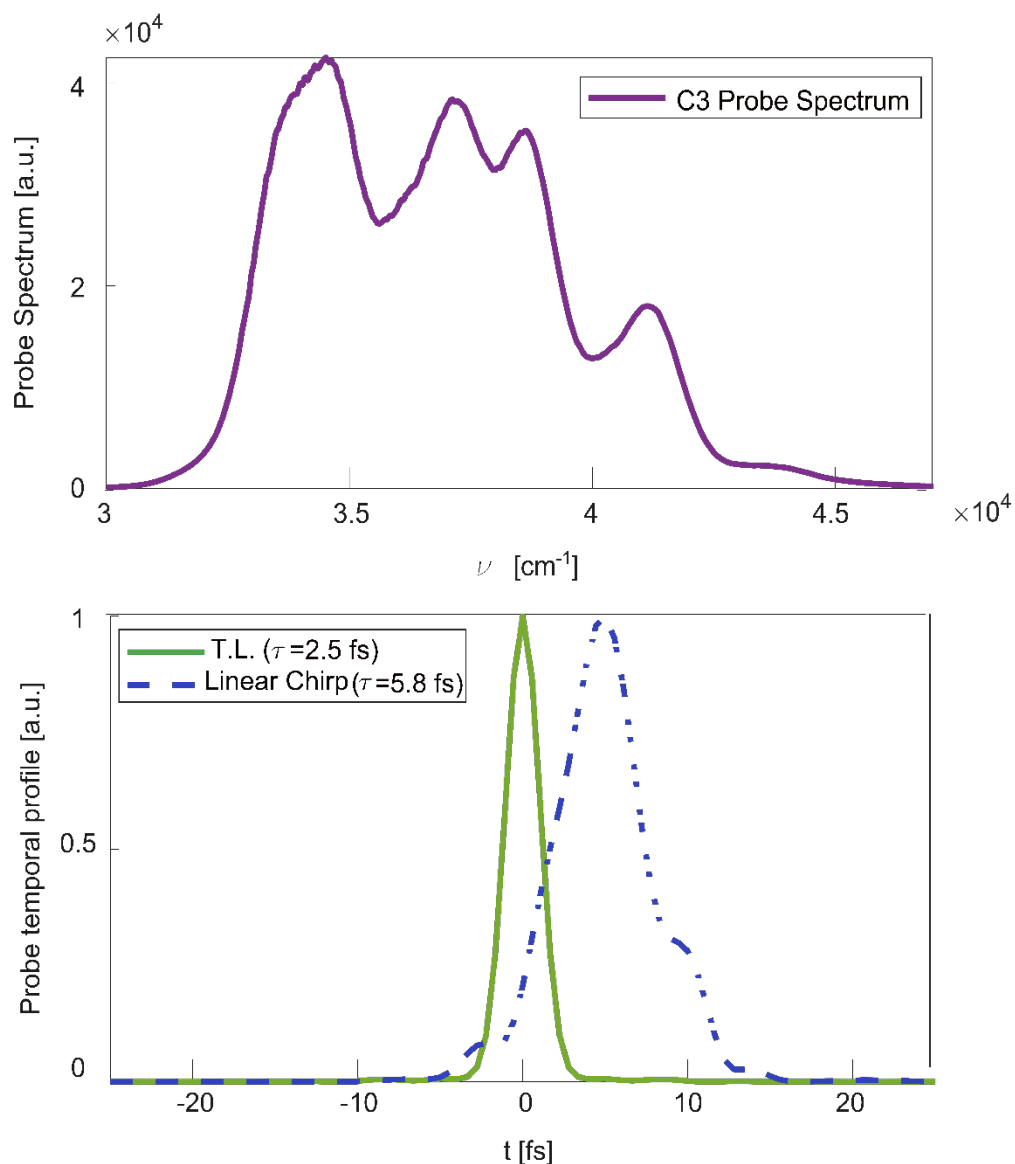

Supplementary Figure 6: Top: Static UV spectrum associated with C3. Bottom: Retrieval of the UV pulse transform-limited duration (green) and of the duration in the presence of linear chirp (blue).

#### Supplementary Note 4: Fourier Analysis

The Fourier analysis of the scans performed over a time window of 50 fs (Fig. 2c, 4, and Supplementary Figure 7) shows a single dominant feature extending between 3000 and 4000  $\text{cm}^{-1}$ . In this case the lower resolution compared to that shown in Fig. 3b and 3c, which were performed over 150 fs, derives from the shorter temporal acquisition window.

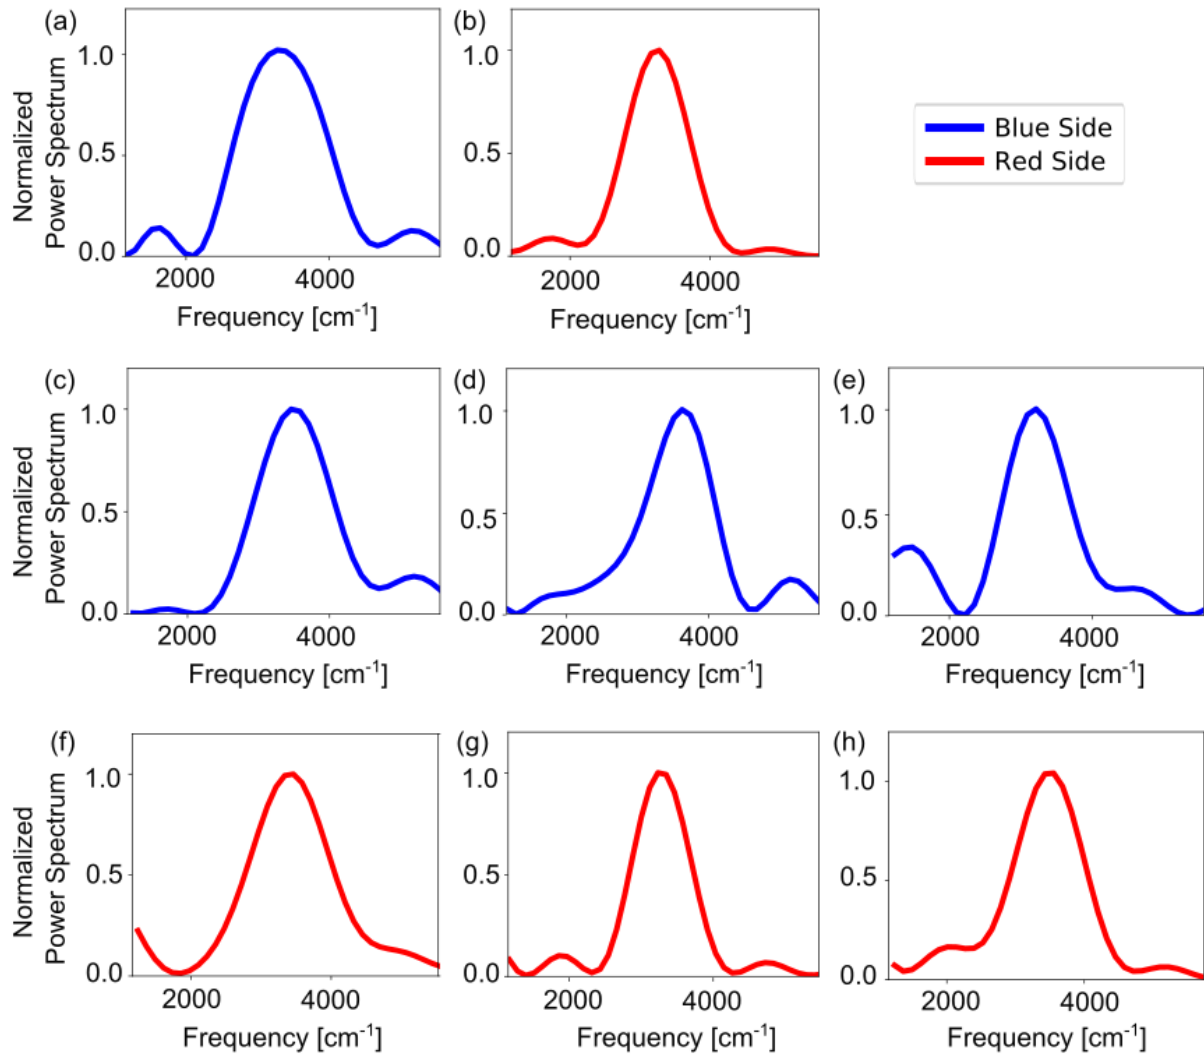

Supplementary Figure 7: Fourier spectra of the blue and red side traces showed in Fig. 2c (a, b) and for the C1 (c, f), C2 (d, g) and C3 (e, h) signals, extracted from the Impulsive Stimulated Raman Scattering (ISRS) data acquired over the short time window of 50 fs and with the same UV probe chirp of the longer scan reported in Fig. 2a and 2b. The transient signals have been integrated on a 30 nm bandwidth (223-253 and 275-305 nm, respectively). The main feature consists in a large band extending between 3000 and 4000  $\text{cm}^{-1}$ , corresponding to the OH stretch mode of liquid water.

### Supplementary Note 5: Theoretical model

The various pathways contributing to the total spectroscopic response can be depicted using Feynman diagrams<sup>1</sup>. According to the diagrammatic theory<sup>2</sup>, the system is represented by the two sides (ket and bra) of the density matrix, while the perturbing electric fields are treated classically<sup>3</sup>. Given the pulse scheme employed in the experiment and the energy levels of liquid water, the two Feynman diagrams illustrating the ISRS response are presented in Figures 2d and 2e. The nonresonant broadband visible-NIR pump, responsible for the first two field interactions at time  $t_1$ , initiates a vibrational coherence ( $|g'\rangle\langle g|$  or  $|g\rangle\langle g'|$ ) in the ground state of the system via intrapulse Raman excitation. After the perturbation, the system evolves unperturbed until it interacts with the probe at time  $t_2$ . As a result, a free induction decay occurs, leaving the system in a population state ( $|g'\rangle\langle g'|$  or  $|g\rangle\langle g|$ ), allowing the detection of the vibrational coherence after a variable time delay,  $T$ .

The third-order nonlinear polarization responsible for the ISRS process can be evaluated through a perturbative expansion of the molecular density matrix in terms of the electric fields (the Raman pump and the probe). The heterodyne-detected ISRS signal  $S(\omega)$  is measured as a function of the probe pulse (P) frequency  $\omega$  and can be computed from the third-order polarization  $P^{(3)}(\omega)$  as:

$$S(\omega) = \log \{S'(\omega)\} = \log \left\{ -\Im \left[ \frac{P^{(3)}(\omega) E_P^*(\omega)}{I_P(\omega)} \right] \right\} \quad (3)$$

where  $E_P(\omega)$  and  $I_P(\omega)$  indicate the probe field and intensity, respectively. To visualize the interference between multiple Raman processes occurring in time-domain vibrational spectroscopy, the total  $P^{(3)}(\omega)$  is dissected as the sum of the two  $A_0$  and  $B_0$  diagrams, depending on whether the two interactions with the off-resonant Raman pump involve the ket (generating the  $P_A^{(3)}(\omega)$  polarization) or the bra side  $P_B^{(3)}(\omega)$  of the density matrix<sup>4</sup>. The total response is obtained as the sum of the  $A_0$  and  $B_0$  contributions, namely  $S'(\omega) = S_A(\omega) + S_B(\omega)$ . In the case of a fully nonresonant ISRS process, the total response of the system is generated by the interference between the  $A_0$  and  $B_0$  diagrams. This interference occurs between pathways involving interactions with different probe pulse spectral components (red-shifted and blue-shifted relative to the probed wavelength)<sup>4-6</sup>.

In the presence of a chirp in the probe pulse<sup>7</sup>, different spectral components reach the sample at varying time delays. This can be modelled by considering a frequency-dependent phase,  $\phi(\omega)$ , whose derivative at a specific frequency, the group delay  $T(\omega) = \frac{d\phi}{d\omega}$ , indicates the arrival time of the corresponding spectral component<sup>8,9</sup>. The probe field  $E_P(\omega)$  in the frequency domain can then be written as

$$E_P(\omega) = E_P^0(\omega) e^{i\phi(\omega)} = E_P^0(\omega) \left[ i \sum_j C_j (\omega - \omega_P)^j \right] \quad (4)$$

where  $E_P^0(\omega)$  is the spectral amplitude and  $\phi(\omega)$  has been expanded in powers of the frequency, namely the  $j$ -order  $C_j$  chirp. The third-order polarization  $P_A^{(3)}(\omega)$ , which involves the  $Q_g$  normal mode, can be calculated from one of the diagrams presented in Figures 2d and 2e as

$$P_A^{(3)}(t) = \left( \frac{i}{\hbar} \right)^2 \frac{\partial \alpha}{\partial Q_{g'}} \mu_{g'e} \mu_{eg} \int_0^\infty d\tau_1 \int_0^\infty d\tau_2 |E_R(t - \tau_1 - \tau_2)|^2 E_P(t - \tau_2) e^{-i\tilde{\omega}_{g'g}\tau_1} e^{-i\tilde{\omega}_{eg}\tau_2} \quad (5)$$

where  $\tilde{\omega}_{ij} = \omega_i - \omega_j - i\gamma_{ij}$  and  $\mu_{ij}$  denotes the dipole transition moment between the  $i$  and  $j$  states<sup>1,10</sup>. Here, for an electronically off-resonant Raman pulse (R), the radiation-matter interaction Hamiltonian that describes the preparation of the vibrational coherence is given by  $H_I^{(R)} = -\alpha \cdot |E_R(t)|^2$ , where  $\alpha$  indicates the molecular polarizability<sup>11,12</sup>. The interaction Hamiltonian depends on the square modulus of the temporal profile of the pump pulse. The preparation of the vibrational coherence is solely influenced by the intensity profile of the pump and will be represented in the signal as the Fourier transform of this intensity, stressing the importance of the Raman pump pulse duration in ISRS experiments. Short pump pulses are key to impulsively stimulating coherent nuclear wave packets of Raman-active modes. For an ideal Dirac delta temporal profile of the Raman pump, all the nuclear oscillators involved in the Raman-active mode start oscillating in phase, resulting in a strong Raman signal; however, the presence of a temporal chirp introduces a phase difference between the frequency components of the pump participating in the coherence preparation, leading to possible destructive interference. In particular, the longer the Raman pump duration, the greater the phase difference between the nuclear oscillators, reducing the Raman cross section and leading to a vanishing signal. Importantly, if the Raman pump pulse duration is longer than the period  $T$  of the Raman-active mode, the vibrational coherence cannot be effectively stimulated<sup>13</sup>.

The interaction with the probe pulse leads to a virtual level  $e$ , with the interaction Hamiltonian that reads as  $H_I^{(P)} = -\mu \cdot E_P$ , where  $\mu$  is the dipole operator. In order to include the inhomogeneous broadening, the distribution of vibrational frequencies  $G(\omega_v) = G_0(\omega_v - \omega_{gg})$  can be taken into account as

$$P_A^{(3)}(t) = \left( \frac{i}{\hbar} \right)^2 \frac{\partial \alpha}{\partial Q_{g'}} \mu_{g'e} \mu_{eg} \int_0^\infty d\tau_1 \int_0^\infty d\tau_2 \int_{-\infty}^\infty d\Delta G_0(\Delta) |E_R(t - \tau_1 - \tau_2)|^2 E_P(t - \tau_2) e^{-i(\tilde{\omega}_{g'g} + \Delta)\tau_1} e^{-i\tilde{\omega}_{eg}\tau_2} \quad (6)$$

where  $G_0(\Delta) = G(\Delta - \omega_{gg})$  is the spectral inhomogeneous broadening function centred at  $\Delta = 0$ ; by Fourier transforming over  $\Delta$  it is possible to express the free propagation over  $\tau_1$  as a function  $\hat{G}_0(\tau)$ , which represents the counterpart of the inhomogeneous broadening in the time domain.

This expression for the third order polarization can be exploited to calculate the  $S_A(\omega)$  signal as

$$S_A(\omega) = -\Im \left[ \frac{E_P^*(\omega)}{I_P(\omega)} \frac{\partial \alpha}{\partial Q_{g'}} \frac{\mu_{g'e} \mu_{eg}}{\hbar^2} \int_{-\infty}^\infty d\Delta \int_{-\infty}^\infty \frac{d\omega_1}{2\pi} \frac{G_0(\Delta) \hat{I}_R(\omega_1) E_P(\omega - \omega_1)}{(\tilde{\omega}_{g'g} + \Delta - \omega_1)(\tilde{\omega}_{eg} - \omega)} \right] \quad (7)$$



Similarly, for the  $B$  diagram we have

$$P_B^{(3)}(t) = -1 \cdot \left(\frac{i}{\hbar}\right)^2 \frac{\partial \alpha}{\partial Q_{g'}} \mu_{ge} \mu_{eg'} \int_0^\infty d\tau_1 \int_0^\infty d\tau_2 \int_{-\infty}^\infty d\Delta G_0(\Delta) I_R(t - \tau_1 - \tau_2) E_P(t - \tau_2) e^{-i(\tilde{\omega}_{gg'} - \Delta)\tau_1} e^{-i(\tilde{\omega}_{eg'} - \Delta)\tau_2}$$

which can be used to calculate the  $S_B(\omega)$  signal as

$$S_B(\omega) = +\Im \left[ \frac{E_P^*(\omega)}{I_P(\omega)} \frac{\partial \alpha}{\partial Q_{g'}} \frac{\mu_{ge} \mu_{eg'}}{\hbar^2} \int_{-\infty}^\infty \frac{d\omega_1}{2\pi} \int_{-\infty}^\infty d\Delta \frac{\hat{I}_R^*(\omega_1) E_P(\omega + \omega_1) G_0(\Delta)}{(\tilde{\omega}_{gg'} - \Delta + \omega_1)(\tilde{\omega}_{eg'} - \Delta - \omega)} \right]$$

Expressing the final signal as a function of the pulse delay  $t_0$  yields

$$S_A(\omega, t_0) = -\Im \left[ \frac{E_P^*(\omega)}{I_P(\omega)} K \int_{-\infty}^\infty \frac{d\omega_1}{2\pi} \int_{-\infty}^\infty d\Delta \frac{G_0(\Delta) \hat{I}_R^{(0)}(\omega_1) E_P(\omega - \omega_1) e^{-i\omega_1 t_0}}{(\tilde{\omega}_{g'g} + \Delta - \omega_1)(\tilde{\omega}_{eg} - \omega)} \right] \quad (8)$$

and

$$S_B(\omega, t_0) = +\Im \left[ \frac{E_P^*(\omega)}{I_P(\omega)} K \int_{-\infty}^\infty \frac{d\omega_1}{2\pi} \int_{-\infty}^\infty d\Delta \frac{G_0(\Delta) \hat{I}_R^{(0)*}(\omega_1) E_P(\omega + \omega_1) e^{+i\omega_1 t_0}}{(\tilde{\omega}_{gg'} - \Delta + \omega_1)(\tilde{\omega}_{eg'} - \Delta - \omega)} \right] \quad (9)$$

where

$$K = \frac{\partial \alpha}{\partial Q_{g'}} \frac{\mu_{ge} \mu_{eg'}}{\hbar^2}$$

These equations can be exploited to directly calculate the ISRS response as a function of both the molecular and experimental parameters. It is worth to stress that for an electronically off-resonant probe with transform-limited pulses ( $C_j=0$ ) and a flat probe spectral profile, these two signals generate time oscillations with the same amplitude but opposite phase; under these conditions,  $S_A$  and  $S_B$  interfere destructively, suppressing the ISRS signal<sup>5,14</sup>. The  $\pi$  phase difference between the two signals can be interpreted as a result of the fact that the preparation of the vibrational coherence occurs on the ket side of the density matrix for the  $A_0$  diagram, and on the bra side for the  $B_0$  diagram. As a result, the vibrational coherence described in the two diagrams form a complex conjugate pair ( $|g\rangle\langle g'| = |g'\rangle\langle g|^*$ ). Interestingly, the signal measured at a given probe frequency  $\omega$  is generated by two pathways which involve spectral components of the probe that are red- ( $S_A$ ) and blue-shifted ( $S_B$ ) by approximately one vibrational quantum. For this reason, the amplitudes of the  $S_A$  and  $S_B$  terms are generally different for a non-flat probe spectral profile. Most importantly, introducing a chirp in the probe pulses allows tuning of the relative phase between the  $S_A$  and  $S_B$  processes, thereby ensuring an amplification of the measured signal.

## References

1. G. Batignani, G. Fumero, S. Mukamel, and T. Scopigno. Energy flow between spectral components in 2D broadband stimulated Raman spectroscopy. *Physical Chemistry Chemical Physics*, 17(16):10454–10461, 2015.1. Batignani, G., Fumero, G., Mukamel, S. & Scopigno, T. Energy flow between spectral components in 2D broadband stimulated Raman spectroscopy. *Phys. Chem. Chem. Phys.* **17**, 10454–10461 (2015).
2. Mukamel, S. *Principles of Nonlinear Spectroscopy*. (Oxford University Press, New York, 1995).
3. Mukamel, S. & Rahav, S. Ultrafast Nonlinear Optical Signals Viewed from the Molecule’s Perspective. in *Advances In Atomic, Molecular, and Optical Physics* vol. 59 223–263 (Elsevier, 2010).
4. Batignani, G., Ferrante, C., Fumero, G. & Scopigno, T. Broadband Impulsive Stimulated Raman Scattering Based on a Chirped Detection. *J. Phys. Chem. Lett.* **10**, 7789–7796 (2019).
5. Gdor, I., Ghosh, T., Lioubashevski, O. & Ruhman, S. Nonresonant Raman Effects on Femtosecond Pump–Probe with Chirped White Light: Challenges and Opportunities. *J. Phys. Chem. Lett.* **8**, 1920–1924 (2017).
6. Zhou, Y., Constantine, S., Harrel, S. & Ziegler, L. D. The probe frequency dependence of nonresonant femtosecond pump–probe nuclear responses: Undercutting vibrational inhomogeneities. *J. Chem. Phys.* **110**, 5893–5905 (1999).

7. Agrawal, G. *Nonlinear Fiber Optics*. (Academic Press, 2013).
8. Walmsley, I. A. & Wong, V. Characterization of the electric field of ultrashort optical pulses. *J. Opt. Soc. Am. B* **13**, 2453 (1996).
9. Smith, B. J., Mahou, P., Cohen, O., Lundeen, J. S. & Walmsley, I. A. Photon pair generation in birefringent optical fibers. *Opt. Express* **17**, 23589 (2009).
10. Dorfman, K. E., Fingerhut, B. P. & Mukamel, S. Time-resolved broadband Raman spectroscopies: A unified six-wave-mixing representation. *J. Chem. Phys.* **139**, 124113 (2013).
11. Tanimura, Y. & Mukamel, S. Two-dimensional femtosecond vibrational spectroscopy of liquids. *J. Chem. Phys.* **99**, 9496–9511 (1993).
12. Batignani, G., Mai, E., Fumero, G., Mukamel, S. & Scopigno, T. Absolute excited state molecular geometries revealed by resonance Raman signals. *Nat. Commun.* **13**, 7770 (2022).
13. Batignani, G. *et al.* Excited-State Energy Surfaces in Molecules Revealed by Impulsive Stimulated Raman Excitation Profiles. *J. Phys. Chem. Lett.* **12**, 9239–9247 (2021).
14. Monacelli, L. *et al.* Manipulating Impulsive Stimulated Raman Spectroscopy with a Chirped Probe Pulse. *J. Phys. Chem. Lett.* **8**, 966–974 (2017).
